# Supplementary material for: Incompatibility and Competitive Exclusion of Genomic Segments between Sibling Drosophila Species
Source: PLOS journal article supplement (doi:10.1371/journal.pgen.1002795), 2012-06-28

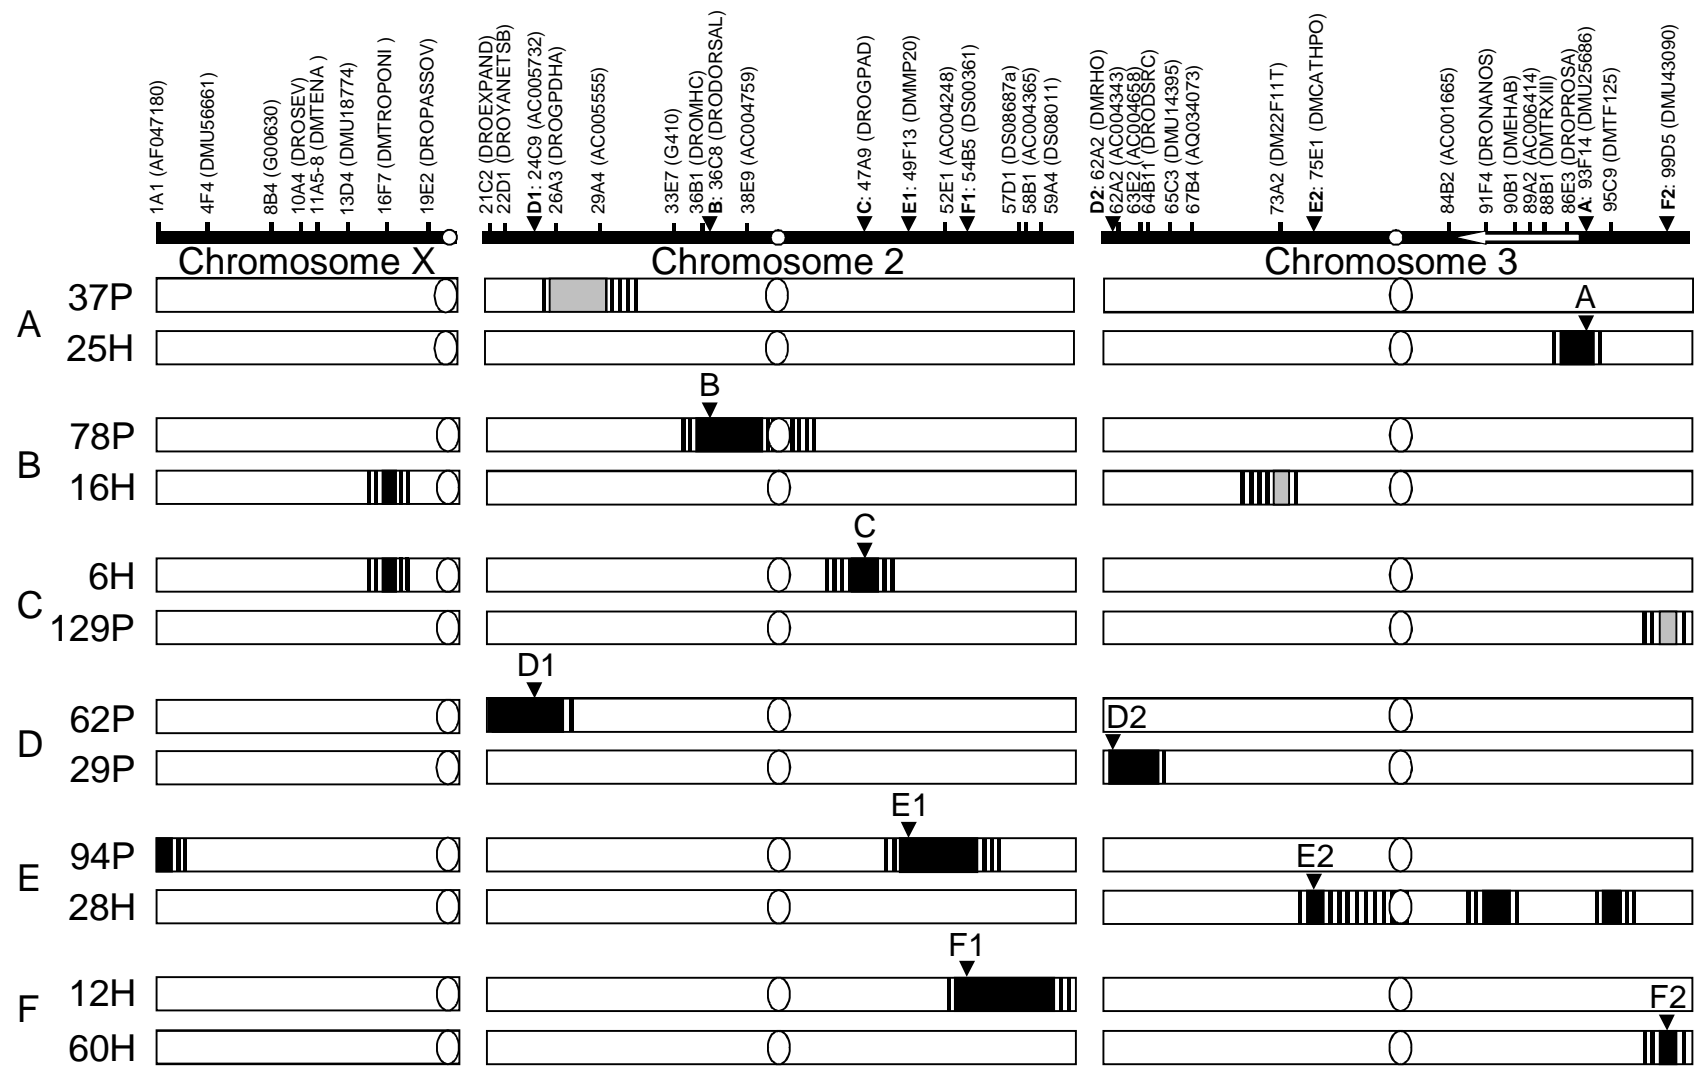

Supplement: S1 (10.1371/journal.pgen.1002795.s001) [file journal.pgen.1002795.s001.pdf › journal.pgen.1002795.s001.pdf]
